# Supplementary material for: Reproduction and metamorphosis in the Myristica Swamp tree frog, Mercurana myristicapalustris (Anura: Rhacophoridae)
Source: PeerJ. 2018 Nov 21;6:e5934. doi: 10.7717/peerj.5934 (PMC6252067; doi:10.7717/peerj.5934)
Supplement: Supplemental Information 6 — Raw data of annual local precipitation (2015-17) acquired from the Kerala Livestock Development Board Bull Station & Farm, Kulathupuzha, which was the closest rain gauge available to us. [file peerj-06-5934-s006.xlsx]

## Sheet: Sheet1
Year	Jan	Feb	Mar	Apr	May	Jun	Jul	Aug	Sep	Oct	Nov	Dec	Total
2015	1.5	9.4	26.6	112.2	100.4	190.4	101.4	56.2	142.9	163.5	162.6	35.1	1102.2
2016	3	0.2	12.6	10.6	143.9	171.5	108.66	55.2	22.8	70.4	48.6	6.8	654.26
2017	9.7	0	63.1	56.2	109	156	61.2	134.9	127.2	147.8	115.4	84	1064.5
